# Supplementary material
Source: PubMed Central journal article supplement (PMC3202895)
Supplement: Supp_Data.pdf [file Supp_Data.pdf]

## Supplementary Data

SUPPLEMENTARY TABLE S1. OLIGONUCLEOTIDE PRIMER AND PROBE SEQUENCES USED FOR REAL-TIME POLYMERASE CHAIN REACTION ANALYSIS OF *XENOPUS* RNA EXPRESSION

| <i>Gene</i>                    | <i>Forward primer</i>                | <i>Reverse primer</i>        | <i>Amplicon length</i> | <i>FAM-probe</i>                      | <i>Accession number</i> |
|--------------------------------|--------------------------------------|------------------------------|------------------------|---------------------------------------|-------------------------|
| <i>Actc</i>                    | GCTGGTAGAGACCT<br>CACAGATTACC        | AATTTCCCGTTCAG<br>CTGTTGTC   | 84                     | TGAAGATCCTGACT<br>GAACGTGGCTAC<br>TCC | NM_001086591.1          |
| <i>c-kit</i>                   | CGCCATCAAAGA<br>GAAACTTCGT           | TCCTGCCGCGGCTA<br>TAAA       | 98                     | CACACTCTGTTTA<br>CCCCCTTGCTGAT<br>TGG | NM_001085708            |
| <i>cMHC<math>\alpha</math></i> | GGCTGTGCGAGGCT<br>GTAAATGC           | TAGGTCCACCATTA<br>GATCCTCGAT | 91                     | TGGAAGAACACAA<br>ACACCGCTTGCA         | NM_001091601.1          |
| <i>cTnI</i>                    | TGCCGACGCCAT<br>GATG                 | GAGATTGGCCCGTA<br>GATCCA     | 70                     | CGCTGTTGGGCAC<br>CAAGCACA             | NM_001087909            |
| <i>EF1<math>\alpha</math></i>  | TACCCTGCTGG<br>AAGCTCTGA             | GAGGCAGACGGAG<br>AGGCTTA     | 70                     | TGCATTCTGCCACC<br>TAGTCGCC            | BC041196.1              |
| <i>GAPDH</i>                   | TGACAACAGTC<br>CATGCTTCACT           | TCTGCCATCTCTCCA<br>CAGCTT    | 77                     | CACCCAGAAGACA<br>GTGGATGGCCC          | U41753                  |
| <i>GATA6</i>                   | CTGACAAGCAT<br>CTCCTACTTGCA          | AAGTIGCCTGGGAC<br>CAGTGA     | 82                     | ATCCCAAGGCGCC<br>CATTCACTGA           | U45454.1                |
| <i>Islet1</i>                  | TCAGCAAGAAC<br>GACTTCGTCAT           | CCACGCAGCGGAA<br>ACAC        | 69                     | AGGGCTCGCTCCA<br>AGGTCTATCA<br>CATC   | NM_001085836            |
| <i>Nkx2.5</i>                  | AACAGGCCAGCA<br>GCGTATCT             | GATAAAAGTTCTAG<br>GCCGAGTCT  | 72                     | CACTTCATCATGG<br>CATCCGAGCTTGG        | NM_001086721            |
| <i>Oct25</i>                   | GGTTTTAGGCTT<br>CAGCTGATCTG          | CATGAGTCCGGCG<br>TTGAAA      | 193                    | CAAGCTCTTGACA<br>CCATGTACAGC<br>CAA   | AJ699165.1              |
| <i>Oct60</i>                   | CACGCCCTGGGAA<br>TATTATACG           | AGGTCAGTTGCAGG<br>GACTCAA    | 75                     | ATGTTCAAGCCAGAC<br>GACTATCTGCCGC      | BC070557.1              |
| <i>Siamois</i>                 | GGTAGAACTTTA<br>CTCTGTTTTGG<br>GAATT | TGTTGTTCTGTTCT<br>TCAAACCTCA | 81                     | CACAGGAGCCTCA<br>GGTCAGCAAAAACC       | NM_001085836            |
| <i>Tbx20</i>                   | CCTCCCTATAGCC<br>GACTTGGT            | GGGCCACTGCCTTG<br>CAT        | 71                     | TGCCGCTTACACCTT<br>CAGCACTAGCA        | BC169926.1              |
| <i>Tbx5</i>                    | CTTCCTCATCTAC<br>CACCTCTTTCC         | GCAGGTGCTGAAC<br>TAGCATAATG  | 76                     | ACAGAATCTGCC<br>CAACGACAGGCC          | BC170344.1              |
